23 **Abstract**

24 Though being fundamental to global diversity distribution, little is known about the geographic  
25 pattern of soil microorganisms across different biomes on a large scale. Here, we investigated soil  
26 prokaryotic communities from Chinese northern grasslands on a scale up to 4,000 km in both alpine  
27 and temperate biomes. Surprisingly, prokaryotic similarities increased with geographic distance  
28 after tipping points of 1,760 - 1,920 km, overturning the well-accepted distance-decay relationship  
29 and generating a significant U-shape pattern. Such U-shape pattern was likely due to decreased  
30 disparities in environmental heterogeneity along with geographic distance when across biomes, as  
31 homogeneous environmental selection dominated prokaryotic assembly based on  $\beta$ NTI analysis.  
32 Consistently, short-term environmental heterogeneity also followed the U-shape pattern spatially,  
33 mainly attributed to dissolved nutrients. In sum, these results demonstrate that homogeneous  
34 environmental selection via dissolved nutrients overwhelmed the “distance” effect when across  
35 biomes, subverting the previously well-accepted geographic pattern for microbes on a large scale.

36

37

38

39

40

41

42

43

44

45 **Introduction**

46 To clarify the spatial pattern of biodiversity is one of primary aims in ecology and biogeography (1,  
47 2). In past decades, intensive biogeographic studies have been conducted for macro-organisms,  
48 including plants (3-8), insects (9, 10) and animals (11, 12). With the emergence and development of  
49 next-generation sequencing, increasing attention has been paid recently to the spatial pattern of  
50 microorganisms. The similarity of microbial communities has been observed to decrease as that of  
51 macro-organisms does with geographic distance, so-called distance-decay relationship, in different  
52 habits (e.g., forests (13, 14), grasslands (15), deserts (16) and agriculture soils (17-19)) for bacteria  
53 (15, 20, 21), archaea (18, 22), fungi (23-26) and specific microbial functional groups (e.g.  
54 ammonia-oxidizing archaea, ammonia-oxidizing and sulfate-reducing bacteria (27-30)). The  
55 reported distance-decay relationship has been regarded as a principal generalization in nature, which  
56 generally rejects the hypothesis of “everything is everywhere, but environment selects” (31).

57

58 However, no consensus has been reached so far on underlying mechanisms of the distance-decay  
59 relationship for soil microbial communities. A few mechanisms for biodiversity maintenance (20)  
60 were proposed to be responsible for such relationship as well, including dispersal limitation,  
61 environmental heterogeneity and stochastic processes (4, 32, 33). Microorganisms have been  
62 observed to have the dispersal limitation as macro-organisms do (2, 34, 35), crucial in biodiversity  
63 maintenance and evolution (33, 36). Spatial configurations and the nature of landscapes influence  
64 the dispersal rate of organisms among sites (32), and communities tend to be more similar in open  
65 and topographically homogeneous settings than in heterogeneous landscapes. Moreover,  
66 environmental heterogeneity tends to increase with geographic distance, responsible for the

67 distance-decay relationship as well (2, 18). Communities are expected to become increasingly  
68 different along with geographic distance as their species are sorted according to their niche  
69 requirements (34). Under this scenario, dissimilarities among communities parallel to increasing  
70 disparities in environmental heterogeneity along with geographic distance. Furthermore, stochastic  
71 processes in birth, death, migration, disperse and drift may also contribute to the distance-decay  
72 relationship for soil microbial communities (37-39).

73

74 The relative importance of various mechanisms is still unclear (4, 32, 33), likely being scale- and  
75 biome-dependent. Environment heterogeneity has been reported to be more important in influencing  
76 the spatial distribution of microorganisms at local scales up to hundreds of kilometers (19, 40, 41),  
77 while dispersal limitation dominated the distance-decay relationship on larger scales (42, 43).  
78 Moreover, different biomes under distinct climate conditions/latitudes may have different turnover  
79 rates for community similarity over geographic distance. High temperature in forest soils was  
80 reported to lead to a lower turnover rate (30), likely due to accelerated biochemical reactions and  
81 increased ecological niche breadth (44). Community similarity was observed to decline faster at  
82 high than low latitudes on large scales, while the turnover rate was higher at low latitudes on small  
83 scales (32). However, most previous studies were conducted locally or regionally within a single  
84 biome or climate type. Thus, surveys for the geographic pattern of soil microorganisms across  
85 different biomes is essential to understand the spatial pattern of microbial communities beyond these  
86 scales.

87

88 Here, we collected grassland soil samples from two biomes with distinct hydrothermal conditions

89 to investigate the spatial pattern of prokaryotic communities and underlying mechanisms. A total of  
90 258 samples were collected from the top- and subsoils in alpine and temperate biomes on a scale up  
91 to 4,000 km, on Tibet Plateau and Inner Mongolia Plateau, respectively. Our objectives were to test  
92 the following hypotheses: (I) soil prokaryotic community similarity would decrease over geographic  
93 distance within and across biomes; (II) the turnover rate of soil prokaryotic community similarity  
94 over geographic distance would be higher in the temperate than alpine biome, as temperate biome  
95 is with a wider temperature range; (III) the turnover rate of soil prokaryotic community similarity  
96 over geographic distance would be lower in top- than subsoil, as the subsoil may be less dynamic  
97 and affected by environmental factors like UV and wind.

98

## 99 **Results**

### 100 **Prokaryotic and plant community similarity over geographic distance**

101 A total of 11,063 OTUs were detected from all 258 grassland soil samples in both alpine and  
102 temperate biomes. A significant ( $P < 0.001$ ) binomial relationship (U shape) was observed for the  
103 prokaryotic community over geographic distance in top- ( $R^2 = 0.161$ ) or subsoil ( $R^2 = 0.114$ ) from  
104 all sites on a scale up to 4,000 km. Specifically, the prokaryotic community similarity in topsoil  
105 decreased over geographic distance on a scale of  $< 1,920$  km mostly within either temperate or  
106 alpine biome, but increased after this tipping point when across biomes (in pairwise sites between  
107 alpine and temperate biomes). Similarly, the prokaryotic community similarity in subsoil decreased  
108 over geographic distance on a scale of  $< 1,760$  km mostly within either temperate or alpine biome,  
109 but increased after this tipping point when across biomes (Figure 1). When across biomes, the  
110 prokaryotic community similarity increased significantly over geographic distance with similar

111 slopes (turnover rates) in top- (slope = 0.007,  $R^2 = 0.199$ ) and subsoil (slope = 0.006,  $R^2 = 0.134$ ).

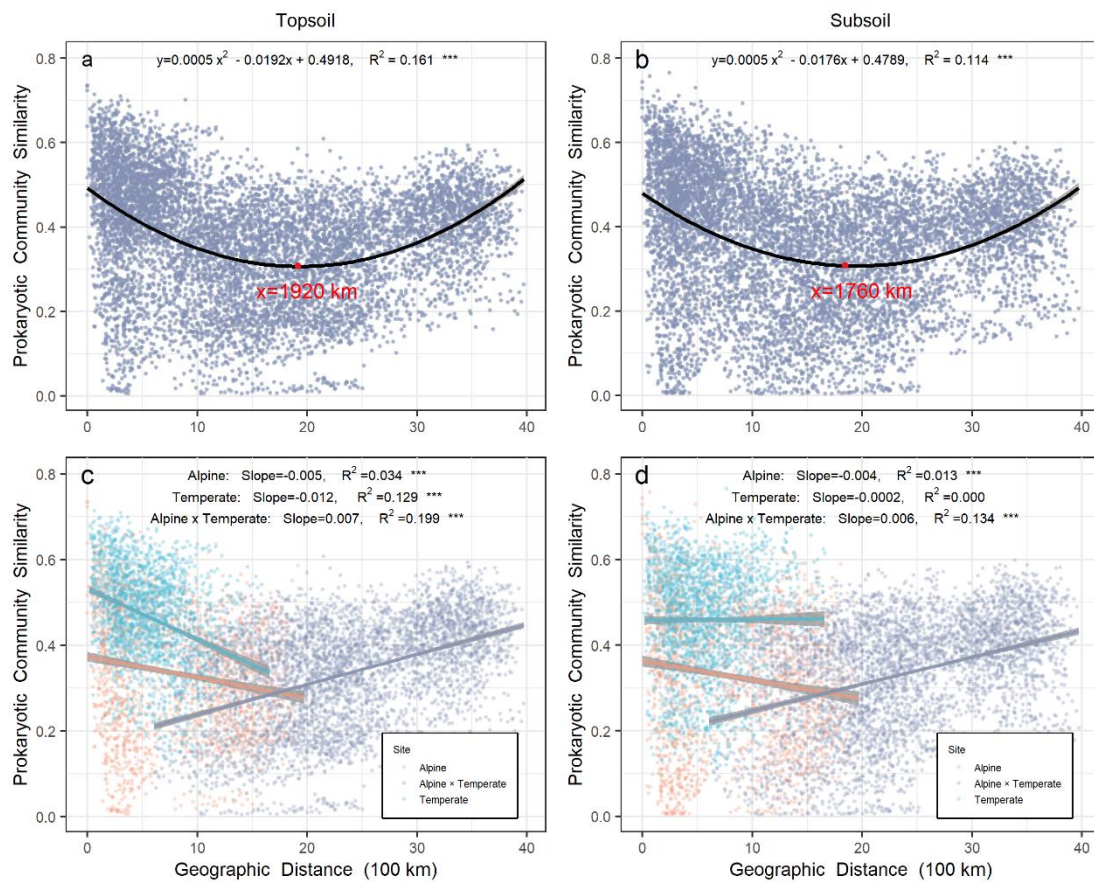

112

113 **Figure 1 Relationship between prokaryotic community similarity over geographic distance in**

114 **Chinese northern grassland.** Panel a and c represent the prokaryotic community in topsoil, while

115 panel b and d represent the prokaryotic community in subsoil. Orange and light blue points represent

116 pairwise sites within the alpine and temperate biome, respectively. Grey points represent pairwise

117 sites between the alpine biome cross temperate biome. Grey shades stand for 95% confidence

118 interval.

119

120 Within the alpine biome, a valid ( $P < 0.001$ ) distance-decay relationship was observed for the

121 prokaryotic community over geographic distance in top- ( $R^2 = 0.034$ ) or subsoil ( $R^2 = 0.013$ ).

122 However, within the temperate biome, the distance-decay relationship for the prokaryotic

123 community occurred only in topsoil ( $R^2 = 0.129, P < 0.001$ ), while no relationship was observed in  
 124 subsoil. In topsoil, prokaryotic community similarity had a higher turnover rate in the temperate (-  
 125 0.012) than alpine biome (- 0.005).

126

127 Similar to the prokaryotic community, the plant community also exhibited a significant U-shape  
 128 relationship ( $R^2 = 0.071, P < 0.001$ ) for its similarity over geographic distance in all sites on a scale  
 129 up to 4,000 km, with a tipping point of 1,858 km (Figure S2a). A significant ( $P < 0.001$ ) distance-  
 130 decay relationship for plant community was observed within the alpine (Figure S2b,  $R^2 = 0.015, P$   
 131  $< 0.001$ ) or temperate biome (Figure S2b,  $R^2 = 0.005, P < 0.01$ ).

132

133 **Prokaryotic community similarity over environmental distance**

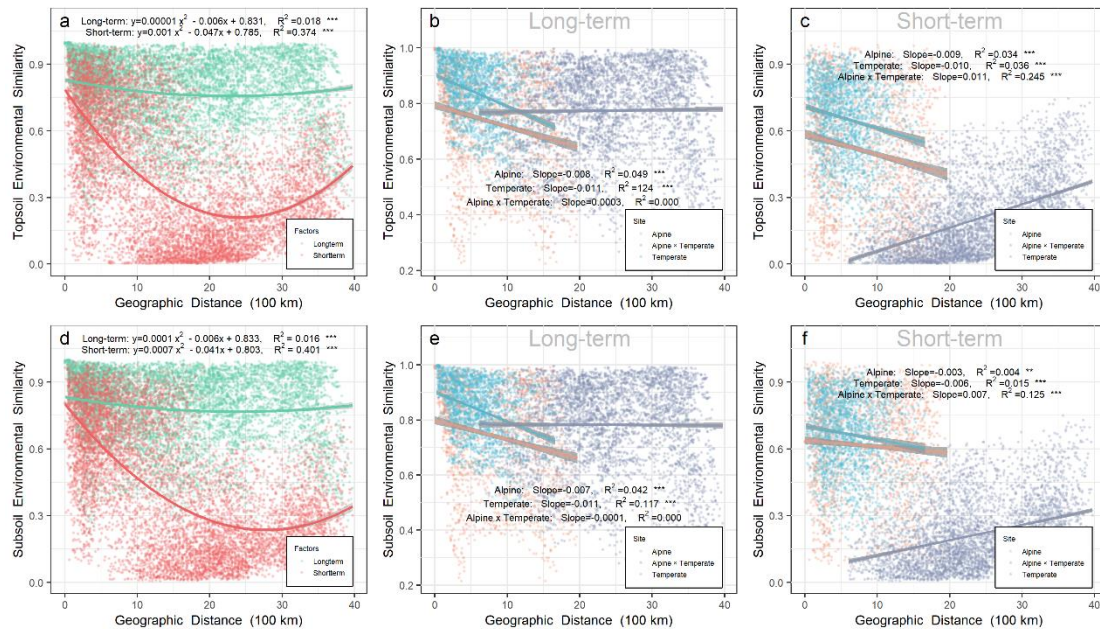

134

135 **Figure 2 Relationship between environmental similarity over geographic distance in Chinese**

136 **northern grassland.** Panel a, b and c represent the environmental similarity in topsoil, while panel

137 d, e and f represent the environmental similarity in subsoil. The environmental similarity was

138 calculated by Bray-Curtis index based on relatively long-term (b, e & green points in a and d) or  
139 short-term variables (c, f & red points in a and d). Relatively long-term environmental variables  
140 included mean annual precipitation (MAP), mean annual temperature (MAT), pH, soil organic  
141 carbon (SOC), soil total nitrogen (TN) and soil total phosphorus (TP). Relatively short-term  
142 environmental variables included soil water content (SWC), soil available phosphorus (AP),  
143 dissolved organic carbon (DOC), dissolved organic nitrogen (DON),  $\text{NH}_4^+$ , and  $\text{NO}_3^-$ . Orange, grey,  
144 and light blue points represent pairwise sites within the alpine biome, within temperate biome, and  
145 alpine biome cross temperate biome, respectively. Grey shades stand for 95% confidence interval.

146

147 Relatively short-term environmental similarity also exhibited a U-shape pattern over geographic  
148 distance in either top- or subsoil from all sites on a scale up to 4,000 km (Figure 2 a and d). In  
149 contrast, relatively long-term environmental similarity, much higher than short-term environmental  
150 similarity on the same scale, did not change greatly over geographical distance in either top- or  
151 subsoil.

152

153 Soil prokaryotic community similarity decreased significantly ( $P < 0.001$ ) in all sites over the  
154 relatively long-term (turnover rate = - 0.291 or - 0.278 in top- or subsoil, respectively) or short-term  
155 (turnover rate = - 0.193 or - 0.159 in top- or subsoil, respectively) environmental distance (Figure  
156 S3 a and e). In the topsoil, the prokaryotic community similarity decreased significantly ( $P < 0.001$ )  
157 over the relatively long-term (turnover rate = - 0.277,  $R^2 = 0.131$ ) or short-term (turnover rate = -  
158 0.194,  $R^2 = 0.135$ ) environmental distance within the alpine biome (Figure S3 b), as well as  
159 decreased over long-term (turnover rate=-0.339,  $R^2 = 0.108$ ) or short-term (turnover rate=-0.063,



160  $R^2 = 0.011$ ) environmental distance within the temperate biome (Figure S3 c). In the subsoil, the  
 161 prokaryotic community similarity decreased significantly over the relatively long-term (turnover  
 162 rate = - 0.279,  $R^2 = 0.104$ ) or short-term (turnover rate = - 0.215,  $R^2 = 0.093$ ) environmental distance  
 163 within the alpine biome (Figure S3 f), while there was no relationship within the temperate biome  
 164 (Figure S3 g). In pairwise sites between the alpine cross temperate biome (Figure S3 d and h), the  
 165 prokaryotic community similarity decreased over relatively long-term (turnover rate = - 0.161 or -  
 166 0.130 in top- or subsoil, respectively) or short-term (turnover rate = - 0.191 or - 0.175 in top- or  
 167 subsoil, respectively) environmental distance.

168

169 **Table 1** Partial Mantel test for relationship between prokaryotic community similarity and relatively  
 170 short-term environmental variables across biomes.

|                                 | Alpine × Temperate |                  |         |                  |
|---------------------------------|--------------------|------------------|---------|------------------|
|                                 | Topsoil            |                  | Subsoil |                  |
|                                 | r                  | p                | r       | p                |
| SWC                             | 0.167              | <b>0.002</b>     | 0.225   | <b>&lt;0.001</b> |
| AP                              | 0.163              | <b>&lt;0.001</b> | 0.038   | 0.231            |
| DOC                             | 0.221              | <b>&lt;0.001</b> | 0.117   | <b>0.027</b>     |
| DON                             | 0.225              | <b>&lt;0.001</b> | 0.200   | <b>0.002</b>     |
| NH <sub>4</sub> <sup>+</sup>    | 0.026              | 0.331            | 0.065   | 0.093            |
| NO <sub>3</sub> <sup>-</sup>    | 0.068              | 0.140            | 0.024   | 0.323            |
| Short-term environment factors* | 0.273              | <b>0.001</b>     | 0.219   | <b>0.001</b>     |

171 \*by Mantel test

172

173 As revealed by Partial Mantel test (Table 1), the significant decay relationship between topsoil  
 174 prokaryotic community similarity and relatively short-term environmental distance across biomes  
 175 was mainly driven by soil water content (SWC,  $r = 0.167$ ,  $p = 0.002$ ), available phosphorus (AP,  $r$

176 = 0.163,  $p = 0.004$ ), dissolved organic carbon (DOC,  $r = 0.221$ ,  $p < 0.001$ ) and dissolved organic  
177 nitrogen (DON,  $r = 0.225$ ,  $p < 0.001$ ). Similar short-term environmental variables (except AP) were  
178 responsible for the significant decay relationship in the subsoil.

179

180 Within the alpine biome, the significant distance-decay relationship between topsoil prokaryotic  
181 community similarity and relatively long-term environmental distance was mainly driven by mean  
182 annual precipitation (MAP,  $r = 0.249$ ,  $p < 0.001$ ), soil organic carbon (SOC,  $r = 0.269$ ,  $p < 0.001$ ),  
183 and soil total nitrogen (TN,  $r = 0.239$ ,  $p < 0.001$ ), while SWC ( $r = 0.534$ ,  $p < 0.001$ ), AP ( $r = 0.297$ ,  
184  $p < 0.001$ ), DOC ( $r = 0.285$ ,  $p < 0.001$ ), DON ( $r = 0.278$ ,  $p < 0.001$ ),  $\text{NH}_4^+$  ( $r = 0.223$ ,  $p < 0.001$ ),  
185 and  $\text{NO}_3^-$  ( $r = 0.133$ ,  $p = 0.031$ ) were responsible for the significant distance-decay relationship  
186 between topsoil prokaryotic community similarity and relatively short-term environmental distance  
187 (Table S1 and S2, Figure S4). Similar relatively long-term and short-term environmental variables  
188 (except AP,  $\text{NH}_4^+$ , and  $\text{NO}_3^-$ ) were responsible for the significant distance-decay relationship of  
189 prokaryotic community similarity in the subsoil within the alpine biome. Within the temperate  
190 biome, the significant distance-decay relationship between topsoil prokaryotic community  
191 similarity and relatively long-term environmental distance was driven by MAP ( $r = 0.334$ ,  $p < 0.001$ ),  
192 SOC ( $r = 0.128$ ,  $p = 0.022$ ), and TN ( $r = 0.117$ ,  $p = 0.021$ ), while DOC ( $r = 0.059$ ,  $p = 0.034$ ) was  
193 responsible for the significant distance-decay relationship between topsoil prokaryotic community  
194 similarity and relatively short-term environmental distance.

195

## 196 **Deterministic and stochastic processes in prokaryotic community assembly**

197  $\beta$ NTI ( $\beta$ -nearest taxon index) analysis was used to distinguish different processes in prokaryotic

198 community assembly. As shown in Figure 3, the range of  $|\beta\text{NTI}| > 2$  indicated that deterministic  
 199 processes played a dominant role (>85%) in prokaryotic community assembly. The contribution of  
 200 deterministic processes was relatively lower in the alpine (Figure 3j; 92.91% and 87.47% in top-  
 201 and sub-soil, respectively) than temperate (96.63% and 94.04% in top- and sub-soil, respectively)  
 202 biome, and higher in the topsoil than subsoil in all sites. Moreover, most  $\beta\text{NTI}$  values were less than  
 203 -2 either in the top- or subsoil from all sites, indicating that prokaryotic communities were assembled  
 204 mainly by homogeneous selection in deterministic processes.

205

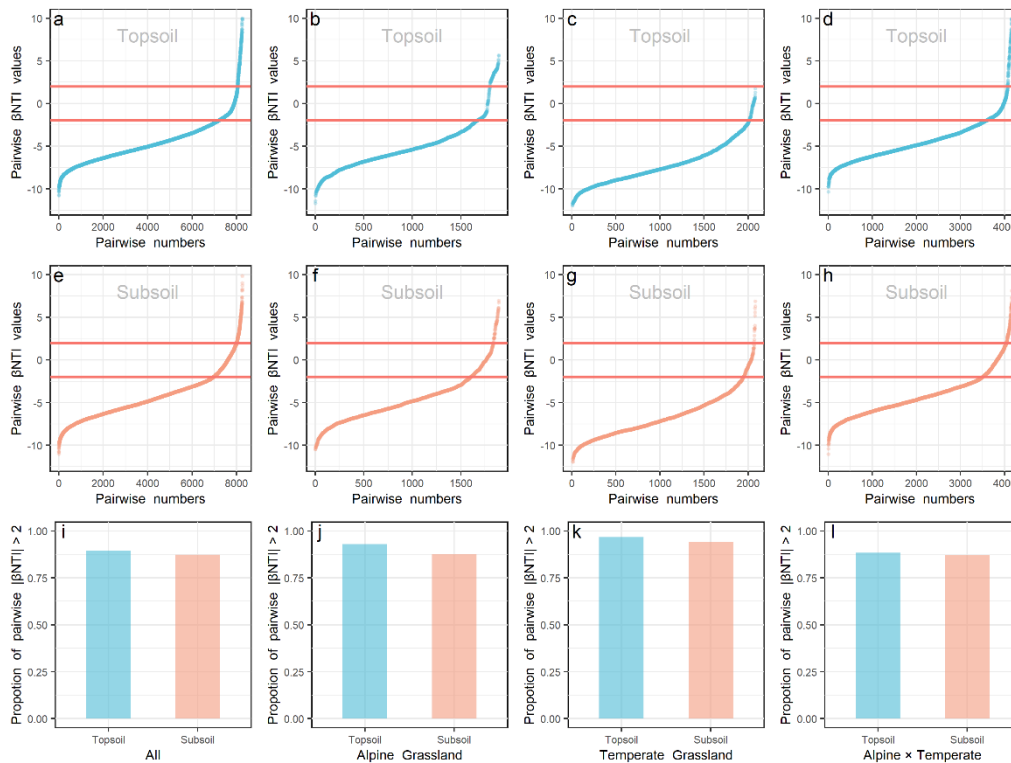

206

207 **Figure 3  $\beta\text{NTI}$  values.**  $\beta\text{NTI}$  values of prokaryote in the top- (a, b, c and d) and subsoil (e, f, g and  
 208 h) from all sites (a and e), within alpine (b and f) or temperate biome (c and g), and pairwise sites  
 209 in the alpine cross temperate biomes (d and h) were presented. The proportion of  $|\beta\text{NTI}| > 2$   
 210 (deterministic processes) in the top- and subsoil from all sites (i), within alpine biome (j), within  
 211 temperate biome (k) and pairwise sites in the alpine cross temperate biomes (l) were presented.

212 Light blue and orange colors stand for  $\beta$ NTI values and their proportions in the top- and subsoil,  
 213 respectively.

214

215 We further compared the immigration rates ( $m$ ) of prokaryotes (Figure S7) based on the algorithm  
 216 developed by Hubbell for the neutral theory (49). Prokaryotic immigration rates were significantly  
 217 lower in the alpine ( $0.159 \pm 0.008$  and  $0.146 \pm 0.008$  in top- and subsoil, respectively) than temperate  
 218 biome ( $0.261 \pm 0.010$  and  $0.246 \pm 0.009$  in top- and subsoil, respectively) in the same soil layer.  
 219 Moreover, immigration rates were higher in the top- ( $0.159 \pm 0.008$  and  $0.261 \pm 0.010$  in the alpine  
 220 and temperate biomes, respectively) than subsoil ( $0.146 \pm 0.008$  and  $0.246 \pm 0.009$  in the alpine and  
 221 temperate biomes, respectively) in the same biome.

222

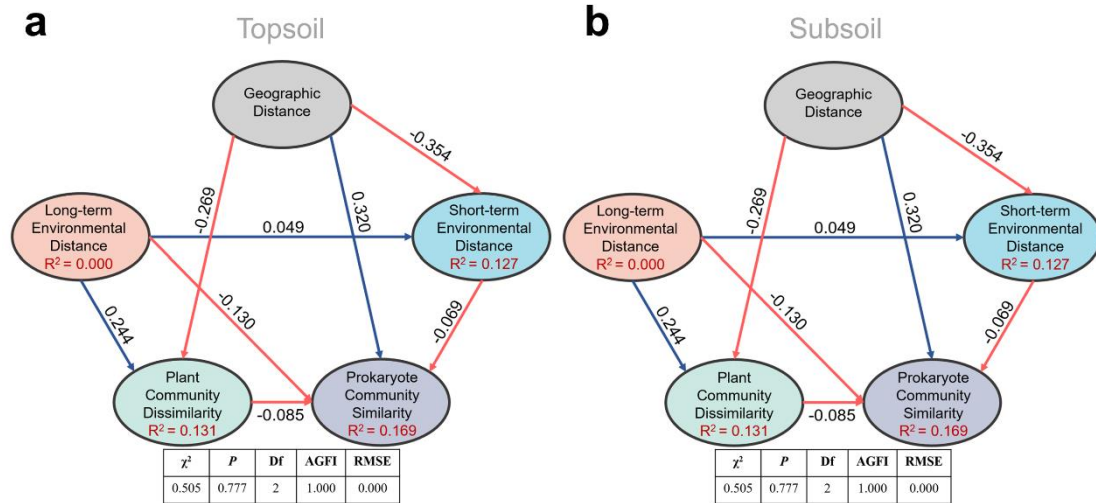

223

224 **Figure 4 Structure equation model to quantify effects of geographic distance, relatively long-**  
 225 **term and short-term environmental distance, and plant community dissimilarity on soil**  
 226 **prokaryotic community similarity in the pairwise sites between alpine cross temperate biomes,**  
 227 **either in top-(a) or subsoil (b). Red and blue lines stand for negative and positive correlations,**  
 228 **respectively; bold lines stand for significance at  $p = 0.05$  level.**

229

230 In the pairwise sites between alpine cross temperate biomes, structural equation model (SEM; Figure  
231 4) showed prokaryotic community similarity was mainly affected by geographic distance ( $r = 0.388$   
232 and  $0.320$  in top- and subsoil, respectively), relatively long-term environmental distance ( $r = -0.171$   
233 and  $-0.130$  in top- and subsoil, respectively), plant community dissimilarity ( $r = -0.124$  and  $-0.065$   
234 in top- and subsoil, respectively), and relatively short-term environmental distance ( $r = -0.046$  and  
235  $-0.069$  in top- and subsoil, respectively).

236

237 Within each biome, geographic distance only had a direct effect on topsoil prokaryotic community  
238 similarity ( $r = -0.275$ ) in the temperate grassland, while its effect in topsoil of the alpine biome was  
239 only indirect through relatively short-term ( $r = 0.140$ ) and long-term environmental distances ( $r =$   
240  $0.222$ ), as well as plant community dissimilarity ( $r = 0.232$ ). In the alpine biome, increases in plant  
241 community dissimilarity, relatively long-term and short-term environmental distances directly  
242 decreased the similarity of soil prokaryotic community. The explained variances of soil prokaryotic  
243 community similarity were  $26.8\%$  and  $21.3\%$  in the top- and subsoil, respectively (Figure S6). In  
244 the temperate biome, other than the direct effect of geographic distance, plant community  
245 dissimilarity, relatively long-term and short-term environmental distances also affected topsoil  
246 prokaryotic community similarity directly. In the subsoil of the temperate biome, prokaryotic  
247 community similarity was not significantly correlated with any factors and the explained variance  
248 was merely  $0.2\%$ .

249

250

251 **Discussion**

252 “Everything is related to everything else, but near things are more related to each other” is termed  
253 as "the first law of geography" (45). Ecologists and biogeographers refer it to the negative  
254 relationship between community similarity and distance as a geographical distance-decay  
255 relationship (46, 47). Though being regarded as a principal generalization, distance-decay  
256 relationship was denied and overturned in this study as prokaryotic community similarity increased  
257 with the geographical distance after tipping points of 1,920 - 1,760 km when across biomes. This  
258 finding is contradictory with most previous studies, including a report that was conducted even at  
259 the similar scale of 4,000 km to ours but within a single biome (temperate biome) (15). Consistently,  
260 when within a single biome of alpine or temperate grassland, the distance-decay relationship was  
261 also valid in this study.

262

263 However, over environmental distance, prokaryotic community similarity showed significant decay  
264 relationships (Figure S5) in all sites on a scale up to 4,000 km in this study, consistent with previous  
265 reports (48, 49). Thus, the U-shape pattern of prokaryotic community similarity over geographic  
266 distance in all sites may be attributed to disparities in environmental heterogeneity over geographic  
267 distance. This is also supported by the  $\beta$ NTI analysis showing that the prokaryotic community  
268 assembly was dominantly determined by homogeneous selection in deterministic processes,  
269 referring similar habitats (environment) harbor similar prokaryotic communities (50, 51). The role  
270 of environment filtering, including biotic and abiotic factors, on microbial community assembly has  
271 been widely reported at the scale of hundreds to thousands of kilometers (19, 40, 41).

272

273 Environmental variables measured in this study were separated into relatively long-term and short-  
274 term environmental variables, judged by dynamic time. Interestingly, the similarity of relatively  
275 short-term environmental variables exhibited a U shape pattern over geographic distance in all sites  
276 on a scale up to 4,000 km, while that of relatively long-term environmental variables did not,  
277 indicating that relatively short-term environmental variables may be responsible for the  
278 homogeneous selection shaping the U shape pattern of prokaryotic community over geographic  
279 distance. Consistently, SEM analyses also revealed a significant direct effect of relatively short-term  
280 environmental distance on prokaryotic community similarity when across biomes. The Partial  
281 Mantel test further demonstrated that water (MAP, SWC) and dissolved nutrients (DOC, DON) were  
282 the primary short-term environmental factors in the significant relationship between prokaryotic  
283 community similarity and geographic distance. The effects of water on the microbial community  
284 have been widely reported (52, 53), as soil water content could determine soil texture, bulk density,  
285 oxygen availability and connectivity within soils (54-56), which can vitally influence soil microbial  
286 community composition (57) and microbial basal respiration in the semi-arid area (58). Soil water  
287 content also influences microbial communities through changing nutrient availability. Plenty of  
288 studies found that DOC and DON affected the distribution pattern of soil microbes (41, 59-62).  
289 Compared to other nutrients, DOC and DON can be utilized by microbes more directly and easily  
290 to provide energy and nutrients for supporting their growth (63, 64).

291

292 In addition to abiotic factors, plant community attributes (65-69), especially plant species identity  
293 (48, 70, 71), may also be important for the U-shape pattern of prokaryotic community similarity.  
294 Our results demonstrated that soil prokaryotic community similarity decreased over the plant

295 community dissimilarity in all sites on a scale up to 4,000 km. Moreover, SEM also revealed the  
296 significantly direct effect of plant community dissimilarity on prokaryotic community similarity in  
297 pairwise sites between alpine cross temperate biomes. Plant community composition and diversity  
298 can affect soil prokaryotic communities through altering the quality and quantity of organic matter  
299 input to soils by the forms of litterfall and root exudates (72). Plants exude a substantial proportion  
300 (11 - 40%) of photosynthesis-derived carbon (73), including sugars, amino acids, organic acids, fatty  
301 acids and secondary metabolites (73-75). Their compounds in exudation can attract beneficial  
302 microorganisms deliberately and influence the assembly of soil microbiomes to promote plants'  
303 adaptation to the surrounding environment (76-81).

304

305 In the topsoil of temperate biome, MAP rather than MAT was responsible for the significant decay  
306 relationship between prokaryotic community similarity and long-term environmental distance,  
307 together with SOC and TN. In the alpine biome, both MAP and MAT were responsible for the  
308 significant distance-decay relationship between the prokaryotic community similarity and long-term  
309 environmental distance in either top- or subsoil, together with pH, SOC, and TN. These phenomena  
310 indicated that the spatial pattern of soil prokaryotic community was driven by both temperature and  
311 water in the alpine biome with a low temperature range (-0.8 to 5.9 °C) and a low precipitation range  
312 (84 to 528 mm) (82). However, the spatial pattern of soil prokaryotic community in the temperate  
313 biome was driven by precipitation (159 to 460 mm) only in the topsoil (15), where temperature is a  
314 limiting factor (1.23 to 4.4 °C). Consistently, our previous study demonstrated that soil microbial  
315 diversity in the alpine biome was mainly affected by temperature especially under the condition of  
316 limited precipitation (83).



317

318 In the topsoil, the turnover rate of prokaryote was higher in temperate than alpine biome (Figure 1).

319 We found that the immigration rate ( $m$ ) of topsoil prokaryotes was higher in the temperate biome

320 than that of the alpine biome (Figure S7), indicating a weakened dispersal limitation that may be

321 responsible for the higher similarity of prokaryotic community in the temperate biome (2, 50). The

322 effects of dispersal limitation on microbial communities (43, 84, 85) were dependent on ecosystems

323 or environmental habitats (86-88). Harsh environments (50, 51, 89) with low temperature, high UV

324 and complex mountain terrain in the alpine biome on the Tibet Plateau would not be conducive for

325 soil prokaryote to disperse. In contrast, the temperate biome has benign temperature, low UV and

326 better landscape connectivity to promote the spatial dispersal of microorganisms.

327

328 Notably, within the temperate biome across 1,661 km, prokaryotic community similarity did not

329 change with the geographic distance in the subsoil. Moreover, subsoil prokaryotic community

330 similarity was not linked with plant community dissimilarity (Figure S5) and long-term

331 environmental distance (Figure S3), or correlated weakly with short-term environmental distance

332 based on the correlation test ( $R^2 = 0.011$ ) and SEM ( $r = -0.002$ ), denying the possibility of plant

333 dependent and environment heterogeneity driven. Cases of no distance-decay relationship for

334 microorganism have also been reported previously (29, 90, 91), explained by the absence of

335 dispersal limitation (29), paleogeographic history (90, 91) that may also be applied in our case and

336 plant dependent (91).

337

338 **Conclusion**

339 This study provides a systematical analysis of the spatial pattern of soil prokaryotic communities in  
340 the northern grassland of China. Soil prokaryotic similarity exhibited a U-shape distribution pattern  
341 over geographic distance at a scale of up to 4,000 km. This finding overturns the well-accepted  
342 distance-decay relationship, which was only valid in the top- or subsoils within the alpine biome  
343 and topsoil only within the temperate biome. Despite different climate and ecosystem types in the  
344 alpine and temperate biomes, habitats far more apart when across biomes were more similarly as  
345 revealed by the U-shape pattern for short-term environmental factors over geographic distance.  
346 Consistently, deterministic processes were found to dominate the soil prokaryotic community  
347 assembly by  $\beta$ NTI analysis, and further partial Mantel analysis revealed that water (MAP and SWC)  
348 and dissolved nutrients (DOC and DON) together may be responsible for the U pattern of  
349 prokaryotic community similarity over geographic distance, overturning the distance-decay  
350 relationship.

351

## 352 **Materials and Methods**

### 353 **Study sites and field sampling**

354

355 A total of 129 sites and 258 samples were collected from the northern grassland of China. Among  
356 them, 128 samples from 64 sites (red dots in Figure S1) were collected from July 29 to August 14,  
357 2014 in the Qinghai-Tibet Plateau alpine biome, China. Alpine biome sample sites covered a variety  
358 of alpine ecosystems, including alpine meadow, alpine steppe, alpine desert, and shrub. One hundred  
359 and twenty-eight samples from 65 sites (blue dots in Figure S1) were collected from September 10  
360 to 24, 2015 in the Inner Mongolia temperate biome, China. Temperate biome sample sites covered

361 three types of temperate biome ecosystem, namely temperate meadow, temperate steppe, and  
362 temperate desert. The distance between each two adjacent sample sites was no less than 60 km and  
363 removed from potential human interference such as towns, villages, and roads.

364 A GPS (global positioning system) was used to record the geographic coordinates and altitudes of  
365 each sample site. Five plots were selected randomly at each site and the distance between the  
366 adjacent two plots was no less than 10 m. After removing plant aboveground biomass and litter,  
367 three topsoil (0-5 cm in depth) and subsoil (5-20 cm in depth) cores (7 cm in diameter) were  
368 randomly sampled within each plot.

369

370 Topsoil or subsoil samples from each plot were pooled and then sieved through a 2 mm mesh, and  
371 the roots were selected as belowground biomass (BGB). Sieved topsoil or subsoil samples were  
372 divided into two subsamples. One part was stored at room temperature and dried in the shade for  
373 measuring physical and chemical properties. The other part was stored at approximately 4 °C in the  
374 field by a mobile refrigerator, delivered with dry ice to the laboratory in Beijing, and finally frozen  
375 at -80 °C in a freezer before DNA extraction.

376

### 377 **Soil properties**

378 Soil pH was measured by pH meter (STARTER3100, Ohaus Instruments Co., Ltd., Shanghai, China)  
379 with a 1:5 of soil water ratio (5 g soil: 25 mL ddH<sub>2</sub>O). SWC was measured by ovening fresh soil  
380 samples at 105°C for 24 h. SOC was measured by a TOC analyzer (Liqui TOC II; Elementar  
381 Analysensysteme GmbH, Hanau, Germany). Soil TN was measured on an auto-analyzer (SEAL  
382 Analytical GmbH, Norderstedt, Germany). Soil TP and AP were measured by a UV-VIS

383 spectrophotometer (UV2700, SHIMADZU, Japan). Nitrate-N ( $\text{NO}_3^-$ ) and ammonium-N ( $\text{NH}_4^+$ )  
384 were extracted with 2 M KCl (soil mass to solution ratio of 1:5) and then analyzed on a continuous-  
385 flow ion auto-analyzer (SEAL Analytical GmbH, Norderstedt, Germany). Soil DOC and DON were  
386 measured on a TOC Analyser (Liqui TOC II; Elementar Analysensysteme GmbH, Hanau, Germany).  
387 Plant aboveground biomass (AGB) and belowground biomass (BGB) were measured after oven  
388 drying at 65 °C for 72 h. MAT and MAP of each study site were obtained from “China  
389 Meteorological Data Service Center” (CMDCC: <https://data.cma.cn/>) by latitude and longitude.

390

### 391 **Microbial analysis**

392 Soil genomic DNA was extracted from 0.25 g frozen soil three times at each soil layer at each site  
393 and then mixed into one DNA sample using PowerSoil™ DNA Isolation Kits (MO BIO Laboratories,  
394 Carlsbad, CA, USA). The quality of extracted DNA was assessed based on OD 260/280 nm and  
395 260/230 nm absorbance ratios by NanoDrop (2000) spectrophotometer (NanoDrop Technologies  
396 inc., Wilmington, DE, USA).

397 Primer pair 515F (5'-GTGYCAGCMGCCGCGGTA-3') and 909R (5'-  
398 CCCCGYCAATTCMTTTRAGT-3') was selected to amplify the V4-V5 region of 16S rRNA and  
399 the target fragment length was 374 bp, and the 12bp barcode was added at the end of 5' of 515F. A  
400 50 µL PCR reaction system was configured in 0.2 mL tube, including 2 µL template DNA diluent,  
401 4 µL dNTP, 4 µL  $\text{Mg}_2^+$ , 5 µL Buffer, 0.5 L Ex Taq™ enzyme, 1 µL forward primer, 1 µL reverse  
402 primer, 32.5 L ddH<sub>2</sub>O. The PCR procedure was performed as follows: predenaturation at 95°C for  
403 10 min, 30 PCR cycles (denaturation at 94°C for 30 s, annealing at 53°C for 25 s, extension at 68°C  
404 for 45 s), and a final extension at 72°C for 10 min.

405 The PCR products were purified by 1% agarose gel using GeneJET Gel Extraction Kit (Thermo,  
406 USA). The purified DNA was tested by NanoDrop (2000) spectrophotometer (NanoDrop  
407 Technologies inc., Wilmington, DE, USA). All purified DNA samples were mixed in 100 ng before  
408 database construction and sequencing, which was performed by Illumina Miseq in Chengdu Biology  
409 Institute.

410 The MiSeq raw data was analyzed by UPARSE pipeline with USEARCH 8 software to obtain an  
411 operational taxon units (OTU) table. Each OTU was annotated by Mothur (v1.27) (92) with  
412 classify.seqs command, and sliva.nr\_v128.align was selected as the reference database. The OTU  
413 table was resampled to the same sequence before further analysis by R 3.5.0 with the resample  
414 package.

415

#### 416 **Statistical analysis**

417 To compare the soil bacterial samples from different climate regions, we divided the soil samples  
418 into alpine samples and temperate samples according to collection sites. The altitude of the alpine  
419 biome sampling sites ranged from 2,796 to 4,891 m, and that of temperate biome was from 10 to  
420 1,796 m. According to the sampling position in the soil layers, samples were divided into topsoil (0-  
421 5 cm) samples and subsoil (5-20 cm) samples. The geographic distance between sites was calculated  
422 based on geographic coordinates by the Euclidean distance method using the vegan package of R.  
423 Plant communities were classified into four functional groups (grasses, sedges, legumes, and forbs)  
424 and plant communities' similarity and dissimilarity were calculated based on Bray-Curtis distance  
425 by the vegan package of R. Environmental factors were divided into relatively long-term  
426 environmental variables that remain relatively stable at least within a year, representing historical

427 contingencies, and relatively short-term environmental variables that are dynamic within a year,  
428 reflecting contemporary disturbances. Relatively long-term environmental variables included MAP,  
429 MAT, pH, SOC, TN, and TP, while relatively short-term environmental variables included SWC,  
430 AP, DOC, DON,  $\text{NH}_4^+$ , and  $\text{NO}_3^-$ .

431

432 The Bray-Curtis similarity and dissimilarity of the prokaryotic community were calculated using  
433 OTU tables resampled to a minimum number of sequences from each sample (7500 in this study).

434 The Mantel test and Partial Mantel test based on a Pearson correlation were used to test the  
435 relationship of soil prokaryotic similarity, geographic distance, and long-term multiple  
436 environmental factors or short-term multiple environmental factors. The turnover rate was estimated  
437 by the slope of the linear regression model based on the least square method. The tipping point was  
438 calculated by the function of  $d(Y)/d(x) = 0$  in binomial function. Pearson correlation was used  
439 to test the relationship of soil prokaryotic diversity with environmental variables.

440

441 The  $\beta\text{NTI}$  was used to distinguish different ecological processes, including deterministic processes  
442 (homogenous selection and heterogeneous selection), random dispersal (homogenous dispersal,  
443 dispersal limitation), drift, and diversification (50). The  $|\beta\text{NTI}| > 2$  means community was  
444 constructed by deterministic processes, and  $\beta\text{NTI} < -2$  means homogenous selection plays a major  
445 role, while  $\beta\text{NTI} > +2$  means heterogeneous is more important. The  $-2 < \beta\text{NTI} < +2$  means stochastic  
446 processes determined community succession (93). A  $\beta\text{NTI}$  analysis was performed by R 3.5.0 with  
447 the ape package. The estimation of immigration rate ( $m$ ) was calculated by TeTame 2.0 (94) based  
448 on Hubbell's neutral theory of biodiversity (95). Parameter estimation was rigorously performed by

449 maximum-likelihood using the sampling formula developed by Etienne (96-99). This model is seen  
450 as a potentially useful null model in ecology; in this model, the species relative abundances in a  
451 guild are determined by two parameters, namely  $\theta$  and  $m$ . The  $\theta$  governs the appearance of a new  
452 species in the regional species pool, and  $m$  governs immigration into local communities of  
453 individuals from the regional species pool. We further used SEM to disentangle the causal pathways  
454 through which geographic distance, short-term environmental distance, long-term environmental  
455 distance, and plants' community dissimilarity influence soil prokaryotic similarity. SEM in this  
456 study is implemented by AMOS software.

457

#### 458 **Acknowledgement**

459 This work was financially supported by the Strategic Priority Research and Program A  
460 (XDA20050104 and XDA1907304) and Program B (XDB15010201) of the Chinese Academy of  
461 Sciences, The Second Tibetan Plateau Scientific Expedition and Research (STEP) program (Grant  
462 No. 2019QZKK0304) and Chinese National Science Foundation (42041005).

463

#### 464 **Additional information**

465 Supplementary information is available for this paper. Reprints and permissions information is  
466 available at [www.nature.com/reprints](http://www.nature.com/reprints).

467

#### 468 **Competing interests**

469 The authors declare no competing financial interests.

470

471 **References**

- 472 1. Bahram M, Koljalg U, Courty P-E, Diedhiou AG, Kjoller R, Polme S, et al. The distance decay of  
473 similarity in communities of ectomycorrhizal fungi in different ecosystems and scales. *J Ecol.*  
474 2013;101(5):1335-44.
- 475 2. Hanson CA, Fuhrman JA, Horner-Devine MC, Martiny JBH. Beyond biogeographic patterns:  
476 processes shaping the microbial landscape. *Nat Rev Microbiol.* 2012;10(7):497-506.
- 477 3. Condit R, Pitman N, Leigh EG, Chave J, Terborgh J, Foster RB, et al. Beta-diversity in tropical  
478 forest trees. *Science.* 2002;295(5555):666-9.
- 479 4. Tuomisto H, Ruokolainen K, Yli-Halla M. Dispersal, environment, and floristic variation of western  
480 Amazonian forests. *Science.* 2003;299(5604):241-4.
- 481 5. Gilbert B, Lechowicz MJ. Neutrality, niches, and dispersal in a temperate forest understory.  
482 *Proceedings of the National Academy of Sciences of the United States of America.* 2004;101(20):7651-  
483 6.
- 484 6. Dexter KG, Terborgh JW, Cunningham CW. Historical effects on beta diversity and community  
485 assembly in Amazonian trees. *Proceedings of the National Academy of Sciences of the United States of*  
486 *America.* 2012;109(20):7787-92.
- 487 7. Zhao Z, Li S, Liu J, Peng J, Wang Y. The distance decay of similarity in climate variation and  
488 vegetation dynamics. *Environ Earth Sci.* 2015;73(8):4659-70.
- 489 8. Draper FC, Baraloto C, Brodrick PG, Phillips OL, Vasquez Martinez R, Honorio Coronado EN, et  
490 al. Imaging spectroscopy predicts variable distance decay across contrasting Amazonian tree  
491 communities. *J Ecol.* 2019;107(2):696-710.
- 492 9. Gomez-Rodriguez C, Baselga A. Variation among European beetle taxa in patterns of distance



- 493 decay of similarity suggests a major role of dispersal processes. *Ecography*. 2018;41(11):1825-34.
- 494 10. van der Mescht L, Warburton EM, Khokhlova IS, Stanko M, Vinarski MV, Korralo-Vinarskaya NP,  
495 et al. Biogeography of parasite abundance: latitudinal gradient and distance decay of similarity in the  
496 abundance of fleas and mites, parasitic on small mammals in the Palearctic, at three spatial scales. *Int J*  
497 *Parasitol*. 2018;48(11):857-66.
- 498 11. Warfe DM, Pettit NE, Magierowski RH, Pusey BJ, Davies PM, Douglas MM, et al. Hydrological  
499 connectivity structures concordant plant and animal assemblages according to niche rather than dispersal  
500 processes. *Freshwater Biol*. 2013;58(2):292-305.
- 501 12. Beisner BE, Peres PR, Lindstrom ES, Barnett A, Longhi ML. The role of environmental and spatial  
502 processes in structuring lake communities from bacteria to fish. *Ecology*. 2006;87(12):2985-91.
- 503 13. Matsuoka S, Kawaguchi E, Osono T. Temporal distance decay of similarity of ectomycorrhizal  
504 fungal community composition in a subtropical evergreen forest in Japan. *Fems Microbiol Ecol*.  
505 2016;92(5).
- 506 14. Oono R, Rasmussen A, Lefevre E. Distance decay relationships in foliar fungal endophytes are  
507 driven by rare taxa. *Environ Microbiol*. 2017;19(7):2794-805.
- 508 15. Wang XB, Lu XT, Yao J, Wang ZW, Deng Y, Cheng WX, et al. Habitat-specific patterns and drivers  
509 of bacterial beta-diversity in China's drylands. *Isme J*. 2017;11(6):1345-58.
- 510 16. Finkel OM, Burch AY, Elad T, Huse SM, Lindow SE, Post AF, et al. Distance-Decay Relationships  
511 Partially Determine Diversity Patterns of Phyllosphere Bacteria on Tamrix Trees across the Sonoran  
512 Desert. *Appl Environ Microb*. 2012;78(17):6187-93.
- 513 17. Jiao S, Yang Y, Xu Y, Zhang J, Lu Y. Balance between community assembly processes mediates  
514 species coexistence in agricultural soil microbiomes across eastern China. *Isme J*. 2020;14(1):202-16.

- 515 18. Jiao S, Xu Y, Zhang J, Lu Y. Environmental filtering drives distinct continental atlases of soil  
516 archaea between dryland and wetland agricultural ecosystems. *Microbiome*. 2019;7.
- 517 19. Shi Y, Li YT, Xiang XJ, Sun RB, Yang T, He D, et al. Spatial scale affects the relative role of  
518 stochasticity versus determinism in soil bacterial communities in wheat fields across the North China  
519 Plain. *Microbiome*. 2018;6.
- 520 20. Zinger L, Boetius A, Ramette A. Bacterial taxa-area and distance-decay relationships in marine  
521 environments. *Mol Ecol*. 2014;23(4):954-64.
- 522 21. Barreto DP, Conrad R, Klose M, Claus P, Enrich-Prast A. Distance-Decay and Taxa-Area  
523 Relationships for Bacteria, Archaea and Methanogenic Archaea in a Tropical Lake Sediment. *Plos One*.  
524 2014;9(10).
- 525 22. Shi Y, Adams JM, Ni Y, Yang T, Jing X, Chen L, et al. The biogeography of soil archaeal  
526 communities on the eastern Tibetan Plateau. *Sci Rep-Uk*. 2016;6.
- 527 23. Chen W, Ren K, Isabwe A, Chen H, Liu M, Yang J. Stochastic processes shape microeukaryotic  
528 community assembly in a subtropical river across wet and dry seasons. *Microbiome*. 2019;7(1).
- 529 24. Wang J, Zhang T, Li L, Li J, Feng Y, Lu Q. The Patterns and Drivers of Bacterial and Fungal beta-  
530 Diversity in a Typical Dryland Ecosystem of Northwest China. *Front Microbiol*. 2017;8.
- 531 25. Yang T, Adams JM, Shi Y, Sun H, Cheng L, Zhang Y, et al. Fungal community assemblages in a  
532 high elevation desert environment: Absence of dispersal limitation and edaphic effects in surface soil.  
533 *Soil Biol Biochem*. 2017;115:393-402.
- 534 26. Zhang J, Zhang B, Liu Y, Guo Y, Shi P, Wei G. Distinct large-scale biogeographic patterns of fungal  
535 communities in bulk soil and soybean rhizosphere in China. *Sci Total Environ*. 2018;644:791-800.
- 536 27. Hu H-W, Zhang L-M, Yuan C-L, Zheng Y, Wang J-T, Chen D, et al. The large-scale distribution of

- 537 ammonia oxidizers in paddy soils is driven by soil pH, geographic distance, and climatic factors. *Front*  
538 *Microbiol.* 2015;6.
- 539 28. Angermeyer A, Crosby SC, Huber JA. Decoupled distance-decay patterns between *dsrA* and 16S  
540 rRNA genes among salt marsh sulfate-reducing bacteria. *Environ Microbiol.* 2016;18(1):75-86.
- 541 29. Zhou JZ, Kang S, Schadt CW, Garten CT. Spatial scaling of functional gene diversity across various  
542 microbial taxa. *Proceedings of the National Academy of Sciences of the United States of America.*  
543 2008;105(22):7768-73.
- 544 30. Zhou J, Deng Y, Shen L, Wen C, Yan Q, Ning D, et al. Temperature mediates continental-scale  
545 diversity of microbes in forest soils. *Nat Commun.* 2016;7.
- 546 31. Ribeiro KF, Duarte L, Crossetti LO. Everything is not everywhere: a tale on the biogeography of  
547 cyanobacteria. *Hydrobiologia.* 2018;820(1):23-48.
- 548 32. Soininen J, McDonald R, Hillebrand H. The distance decay of similarity in ecological communities.  
549 *Ecography.* 2007;30(1):3-12.
- 550 33. Cottenie K. Integrating environmental and spatial processes in ecological community dynamics.  
551 *Ecology Letters.* 2005;8(11):1175-82.
- 552 34. Bell T. Experimental tests of the bacterial distance-decay relationship. *Isme Journal.*  
553 2010;4(11):1357-65.
- 554 35. Lindstrom ES, Ostman O. The Importance of Dispersal for Bacterial Community Composition and  
555 Functioning. *Plos One.* 2011;6(10).
- 556 36. Leibold MA, Holyoak M, Mouquet N, Amarasekare P, Chase JM, Hoopes MF, et al. The  
557 metacommunity concept: a framework for multi-scale community ecology. *Ecology Letters.*  
558 2004;7(7):601-13.

- 559 37. Stegen JC, Lin X, Konopka AE, Fredrickson JK. Stochastic and deterministic assembly processes  
560 in subsurface microbial communities. *Isme J.* 2012;6(9):1653-64.
- 561 38. Chase JM, Myers JA. Disentangling the importance of ecological niches from stochastic processes  
562 across scales. *Philos T R Soc B.* 2011;366(1576):2351-63.
- 563 39. Hubbell SP. Neutral theory in community ecology and the hypothesis of functional equivalence.  
564 *Functional Ecology.* 2005;19(1):166-72.
- 565 40. Feng M, Tripathi BM, Shi Y, Adams JM, Zhu Y-G, Chu H. Interpreting distance-decay pattern of  
566 soil bacteria via quantifying the assembly processes at multiple spatial scales. *Microbiologyopen.*  
567 2019;8(9).
- 568 41. Chu H, Sun H, Tripathi BM, Adams JM, Huang R, Zhang Y, et al. Bacterial community dissimilarity  
569 between the surface and subsurface soils equals horizontal differences over several kilometers in the  
570 western Tibetan Plateau. *Environ Microbiol.* 2016;18(5):1523-33.
- 571 42. Green JL, Holmes AJ, Westoby M, Oliver I, Briscoe D, Dangerfield M, et al. Spatial scaling of  
572 microbial eukaryote diversity. *Nature.* 2004;432(7018):747-50.
- 573 43. Whitaker RJ, Grogan DW, Taylor JW. Geographic barriers isolate endemic populations of  
574 hyperthermophilic archaea. *Science.* 2003;301(5635):976-8.
- 575 44. Okie JG, Van Horn DJ, Storch D, Barrett JE, Gooseff MN, Kopsova L, et al. Niche and metabolic  
576 principles explain patterns of diversity and distribution: theory and a case study with soil bacterial  
577 communities. *Proceedings of the Royal Society B-Biological Sciences.* 2015;282(1809).
- 578 45. Tobler WR, Mielke HW, Detwyler TR. Geobotanical distance between New-Zealand and  
579 neighboring island. *Bioscience.* 1970;20(9):537-&.
- 580 46. Nekola JC, White PS. The distance decay of similarity in biogeography and ecology. *Journal of*

- 581 Biogeography. 1999;26(4):867-78.
- 582 47. Wang X, Wen X, Deng Y, Xia Y, Yang Y, Zhou J. Distance-Decay Relationship for Biological  
583 Wastewater Treatment Plants. *Appl Environ Microb*. 2016;82(16):4860-6.
- 584 48. Leff JW, Bardgett RD, Wilkinson A, Jackson BG, Pritchard WJ, De Long JR, et al. Predicting the  
585 structure of soil communities from plant community taxonomy, phylogeny, and traits. *Isme J*.  
586 2018;12(7):1794-805.
- 587 49. Xing R, Gao Q-b, Zhang F-q, Wang J-l, Chen S-l. Large-scale distribution of bacterial communities  
588 in the Qaidam Basin of the Qinghai-Tibet Plateau. *Microbiologyopen*. 2019;8(10).
- 589 50. Zhou J, Ning D. Stochastic Community Assembly: Does It Matter in Microbial Ecology?  
590 *Microbiology and Molecular Biology Reviews*. 2017;81(4).
- 591 51. Zhang B, Xue K, Zhou S, Che R, Du J, Tang L, et al. Phosphorus mediates soil prokaryote  
592 distribution pattern along a small-scale elevation gradient in Noijin Kangsang Peak, Tibetan Plateau.  
593 *Fems Microbiol Ecol*. 2019;95(6).
- 594 52. Suseela V, Conant RT, Wallenstein MD, Dukes JS. Effects of soil moisture on the temperature  
595 sensitivity of heterotrophic respiration vary seasonally in an old-field climate change experiment. *Global  
596 Change Biology*. 2012;18(1):336-48.
- 597 53. Moyano FE, Manzoni S, Chenu C. Responses of soil heterotrophic respiration to moisture  
598 availability: An exploration of processes and models. *Soil Biol Biochem*. 2013;59:72-85.
- 599 54. Kaye JP, Hart SC. Competition for nitrogen between plants and soil microorganisms. *Trends in  
600 Ecology & Evolution*. 1997;12(4):139-43.
- 601 55. Brockett BFT, Prescott CE, Grayston SJ. Soil moisture is the major factor influencing microbial  
602 community structure and enzyme activities across seven biogeoclimatic zones in western Canada. *Soil*

- 603 Biol Biochem. 2012;44(1):9-20.
- 604 56. Mansson KF, Olsson MO, Falkengren-Grerup U, Bengtsson G. Soil moisture variations affect short-  
605 term plant- microbial competition for ammonium, glycine, and glutamate. *Ecol Evol.* 2014;4(7):1061-  
606 72.
- 607 57. Li Y, Adams J, Shi Y, Wang H, He J-S, Chu H. Distinct Soil Microbial Communities in habitats of  
608 differing soil water balance on the Tibetan Plateau. *Sci Rep-Uk.* 2017;7.
- 609 58. Wichern F, Joergensen RG. Soil Microbial Properties Along a Precipitation Transect in Southern  
610 Africa. *Arid Land Research and Management.* 2009;23(2):115-26.
- 611 59. Hu Y, Xiang D, Veresoglou SD, Chen F, Chen Y, Hao Z, et al. Soil organic carbon and soil structure  
612 are driving microbial abundance and community composition across the arid and semi-arid grasslands in  
613 northern China. *Soil Biol Biochem.* 2014;77:51-7.
- 614 60. Chen D, Mi J, Chu P, Cheng J, Zhang L, Pan Q, et al. Patterns and drivers of soil microbial  
615 communities along a precipitation gradient on the Mongolian Plateau. *Landscape Ecol.* 2015;30(9):1669-  
616 82.
- 617 61. Zeng J, Liu X, Song L, Lin X, Zhang H, Shen C, et al. Nitrogen fertilization directly affects soil  
618 bacterial diversity and indirectly affects bacterial community composition. *Soil Biol Biochem.*  
619 2016;92:41-9.
- 620 62. He D, Xiang X, He J-S, Wang C, Cao G, Adams J, et al. Composition of the soil fungal community  
621 is more sensitive to phosphorus than nitrogen addition in the alpine meadow on the Qinghai-Tibetan  
622 Plateau. *Biol Fert Soils.* 2016;52(8):1059-72.
- 623 63. Alden L, Demoling F, Baath E. Rapid method of determining factors limiting bacterial growth in  
624 soil. *Appl Environ Microb.* 2001;67(4):1830-8.

- 625 64. Drenovsky RE, Vo D, Graham KJ, Scow KM. Soil water content and organic carbon availability  
626 are major determinants of soil microbial community composition. *Microbial Ecology*. 2004;48(3):424-  
627 30.
- 628 65. de Vries FT, Manning P, Tallowin JRB, Mortimer SR, Pilgrim ES, Harrison KA, et al. Abiotic  
629 drivers and plant traits explain landscape-scale patterns in soil microbial communities. *Ecology Letters*.  
630 2012;15(11):1230-9.
- 631 66. Grayston SJ, Wang SQ, Campbell CD, Edwards AC. Selective influence of plant species on  
632 microbial diversity in the rhizosphere. *Soil Biol Biochem*. 1998;30(3):369-78.
- 633 67. Singh BK, Millard P, Whiteley AS, Murrell JC. Unravelling rhizosphere-microbial interactions:  
634 opportunities and limitations. *Trends Microbiol*. 2004;12(8):386-93.
- 635 68. Berg G, Smalla K. Plant species and soil type cooperatively shape the structure and function of  
636 microbial communities in the rhizosphere. *Fems Microbiol Ecol*. 2009;68(1):1-13.
- 637 69. Hiiesalu I, Paertel M, Davison J, Gerhold P, Metsis M, Moora M, et al. Species richness of  
638 arbuscular mycorrhizal fungi: associations with grassland plant richness and biomass. *New Phytologist*.  
639 2014;203(1):233-44.
- 640 70. Peay KG, Baraloto C, Fine PVA. Strong coupling of plant and fungal community structure across  
641 western Amazonian rainforests. *Isme J*. 2013;7(9):1852-61.
- 642 71. Prober SM, Leff JW, Bates ST, Borer ET, Firn J, Harpole WS, et al. Plant diversity predicts beta but  
643 not alpha diversity of soil microbes across grasslands worldwide. *Ecology Letters*. 2015;18(1):85-95.
- 644 72. van der Heijden MGA. The unseen majority: Soil microbes as drivers of plant diversity and  
645 productivity in terrestrial ecosystems (vol 11, pg 296, 2008). *Ecology Letters*. 2008;11(6):651-.
- 646 73. Badri DV, Vivanco JM. Regulation and function of root exudates. *Plant Cell Environ*.

- 647 2009;32(6):666-81.
- 648 74. Bais HP, Weir TL, Perry LG, Gilroy S, Vivanco JM. The role of root exudates in rhizosphere  
649 interactions with plants and other organisms. *Annual Review of Plant Biology*. 2006;57:233-66.
- 650 75. Baetz U, Martinoia E. Root exudates: the hidden part of plant defense. *Trends in Plant Science*.  
651 2014;19(2):90-8.
- 652 76. Bulgarelli D, Schlaeppi K, Spaepen S, van Themaat EVL, Schulze-Lefert P. Structure and Functions  
653 of the Bacterial Microbiota of Plants. In: Merchant SS, editor. *Annual Review of Plant Biology*, Vol 64.  
654 *Annual Review of Plant Biology*. 642013. p. 807-38.
- 655 77. Hooper DU, Bignell DE, Brown VK, Brussaard L, Dangerfield JM, Wall DH, et al. Interactions  
656 between aboveground and belowground biodiversity in terrestrial ecosystems: Patterns, mechanisms, and  
657 feedbacks. *Bioscience*. 2000;50(12):1049-61.
- 658 78. Wardle DA. The influence of biotic interactions on soil biodiversity. *Ecology Letters*.  
659 2006;9(7):870-86.
- 660 79. Mellado-Vazquez PG, Lange M, Bachmann D, Gockele A, Karlowsky S, Milcu A, et al. Plant  
661 diversity generates enhanced soil microbial access to recently photosynthesized carbon in the rhizosphere.  
662 *Soil Biol Biochem*. 2016;94:122-32.
- 663 80. Jones DL. Organic acids in the rhizosphere - a critical review. *Plant and Soil*. 1998;205(1):25-44.
- 664 81. Zhalnina K, Louie KB, Hao Z, Mansoori N, da Rocha UN, Shi S, et al. Dynamic root exudate  
665 chemistry and microbial substrate preferences drive patterns in rhizosphere microbial community  
666 assembly. *Nature Microbiology*. 2018;3(4):470-80.
- 667 82. Delgado-Baquerizo M, Maestre FT, Reich PB, Jeffries TC, Gaitan JJ, Encinar D, et al. Microbial  
668 diversity drives multifunctionality in terrestrial ecosystems. *Nat Commun*. 2016;7.



- 669 83. Xue K, Zhang B, Zhou S, Ran Q, Tang L, Che R, et al. Soil microbial communities in alpine  
670 grasslands on the Tibetan Plateau and their influencing factors. *Chinese Science Bulletin*.  
671 2019;64(27):2915-27.
- 672 84. Horner-Devine MC, Lage M, Hughes JB, Bohannan BJM. A taxa-area relationship for bacteria.  
673 *Nature*. 2004;432(7018):750-3.
- 674 85. Martiny JBH, Eisen JA, Penn K, Allison SD, Horner-Devine MC. Drivers of bacterial beta-diversity  
675 depend on spatial scale. *Proceedings of the National Academy of Sciences of the United States of*  
676 *America*. 2011;108(19):7850-4.
- 677 86. Chase JM. Drought mediates the importance of stochastic community assembly. *Proceedings of the*  
678 *National Academy of Sciences of the United States of America*. 2007;104(44):17430-4.
- 679 87. Evans S, Martiny JBH, Allison SD. Effects of dispersal and selection on stochastic assembly in  
680 microbial communities. *Isme J*. 2017;11(1):176-85.
- 681 88. Louca S, Jacques SMS, Pires APF, Leal JS, Srivastava DS, Parfrey LW, et al. High taxonomic  
682 variability despite stable functional structure across microbial communities. *Nature Ecology & Evolution*.  
683 2017;1(1).
- 684 89. Young JW, Locke JCW, Elowitz MB. Rate of environmental change determines stress response  
685 specificity. *Proceedings of the National Academy of Sciences of the United States of America*.  
686 2013;110(10):4140-5.
- 687 90. Cox F, Newsham KK, Bol R, Dungait JAJ, Robinson CH. Not poles apart: Antarctic soil fungal  
688 communities show similarities to those of the distant Arctic. *Ecology Letters*. 2016;19(5):528-36.
- 689 91. Davison J, Moora M, Oepik M, Adholeya A, Ainsaar L, Ba A, et al. Global assessment of arbuscular  
690 mycorrhizal fungus diversity reveals very low endemism. *Science*. 2015;349(6251):970-3.

- 691 92. Schloss PD, Westcott SL, Ryabin T, Hall JR, Hartmann M, Hollister EB, et al. Introducing mothur:  
692 Open-Source, Platform-Independent, Community-Supported Software for Describing and Comparing  
693 Microbial Communities. *Appl Environ Microb.* 2009;75(23):7537-41.
- 694 93. Dini-Andreote F, Stegen JC, van Elsas JD, Salles JF. Disentangling mechanisms that mediate the  
695 balance between stochastic and deterministic processes in microbial succession. *Proceedings of the  
696 National Academy of Sciences of the United States of America.* 2015;112(11):E1326-E32.
- 697 94. Chave J, Jabot F. Estimation of neutral parameters by maximum likelihood. *Université Paul Sabatier.*  
698 2008.
- 699 95. SP. H. *The unified neutral theory of biodiversity and biogeography.* Princeton University Press.  
700 2001;Princeton(NJ).
- 701 96. Etienne RS. A new sampling formula for neutral biodiversity. *Ecology Letters.* 2005;8(3):253-60.
- 702 97. Etienne RS, Alonso D. A dispersal-limited sampling theory for species and alleles. *Ecology Letters.*  
703 2005;8(11):1147-56.
- 704 98. Etienne RS, Olf H. Confronting different models of community structure to species-abundance  
705 data: a Bayesian model comparison. *Ecology Letters.* 2005;8(5):493-504.
- 706 99. Etienne RS, Latimer AM, Silander JA, Cowling RM. Comment on "Neutral ecological theory  
707 reveals isolation and rapid speciation in a biodiversity hot spot". *Science.* 2006;311(5761):610B-+.
- 708

1 **Supplementary**

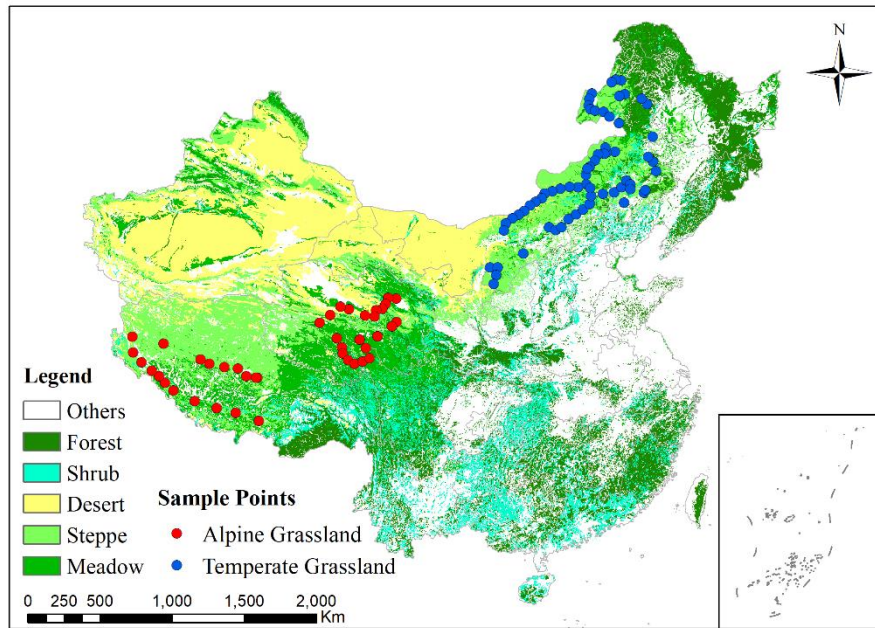

2

3 **Figure S1 Sampling sites across 1,921 km of the alpine grassland in Qinghai-Tibet Plateau**  
4 **(in red) and 1,661 km of the temperate grassland in Inner Mongolia (in blue).**

5

6

7

8

9

10

11

12

13

14

15

16

17

18

19

20

21

22

23

24

25

26

27

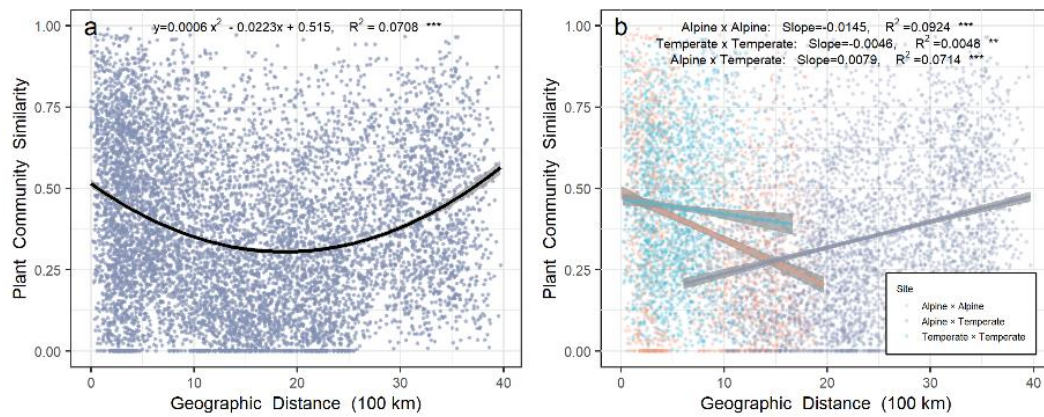

28

29

30 **Figure S2 Relationship between plant community similarity over geographic distance in**  
31 **northern grassland of China.** Light blue points are for pairwise sites in the alpine grassland.  
32 Orange points are for pairwise sites in the temperate grassland. Grey points are for pairwise sites  
33 between the alpine grassland cross temperate grassland. Grey shades stand for 95% confidence  
34 interval.

35

36

37

38

39

40

41

42

43

44

45

46

47

48

49

50

51

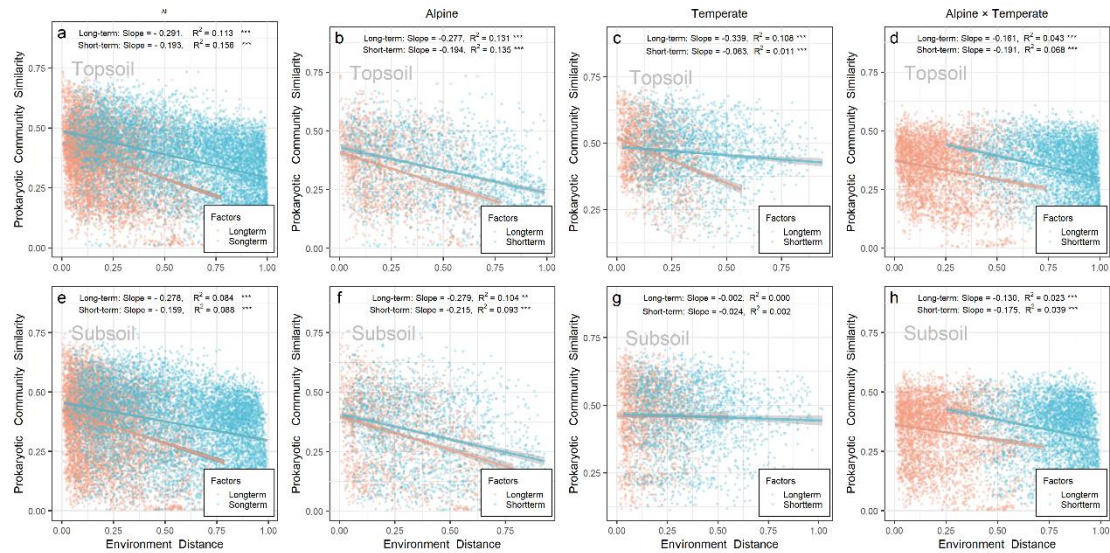

52

53 **Figure S3 Distance decay relationship for prokaryotic community similarity over relative**

54 **long-term (orange points) and short-term (light blue points) environmental factors. (a-d)**

55 **topsoil; (e-h) subsoil. Shades stand for 95% confidence interval.**

56

57

58

59

60

61

62

63

64

65

66

67

68

69

70

71

72

73

74

75

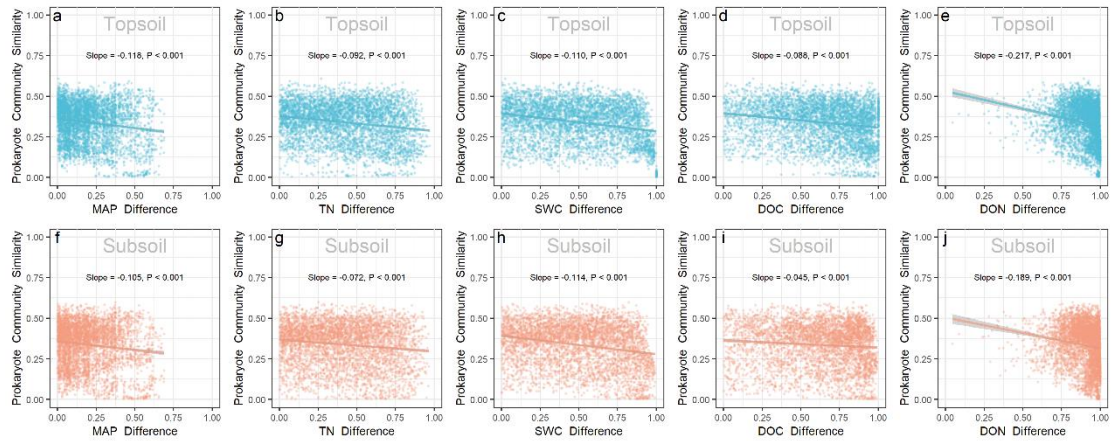

76

77 **Figure S4 The scatter plots of the mantel correlation for prokaryotic community similarity**  
78 **with individual environment factor (MAP, TN, SWC, DOC, and DON) Bray-Curtis distance.**  
79 **Panels a-e were for topsoil, and panel f-j for subsoil.**

80

81

82

83

84

85

86

87

88

89

90

91

92

93

94

95

96

97

98

99

100

101

102

103

104

105

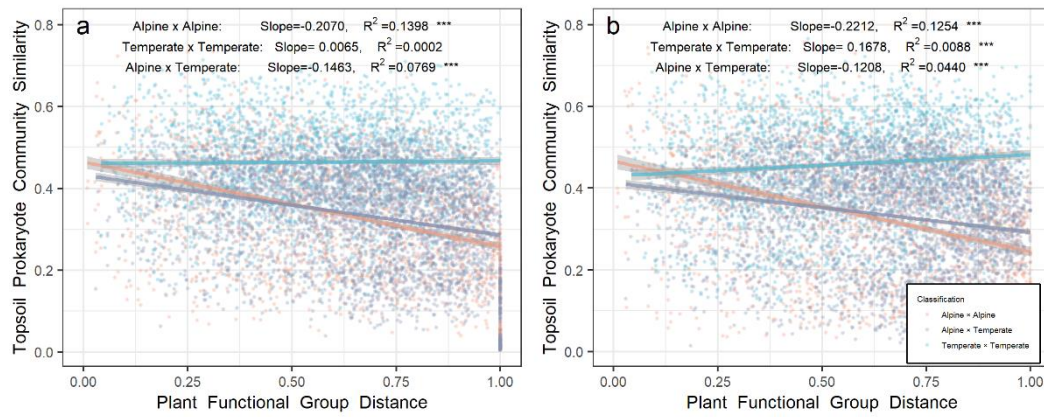

106

107

**Figure S5 Relationship between prokaryote community over plant community dissimilarity.**

108

(a) topsoil; (b)subsoil. Light blue points are for pairwise sites in the alpine grassland. Orange points

109

are for pairwise sites in the temperate grassland. Grey points are for pairwise sites between the alpine

110

grassland cross temperate grassland. Grey shades stand for 95% confidence interval.

111

112

113

114

115

116

117

118

119

120

121

122

123

124

125

126

127

128

129

130

131

132

133

134

135

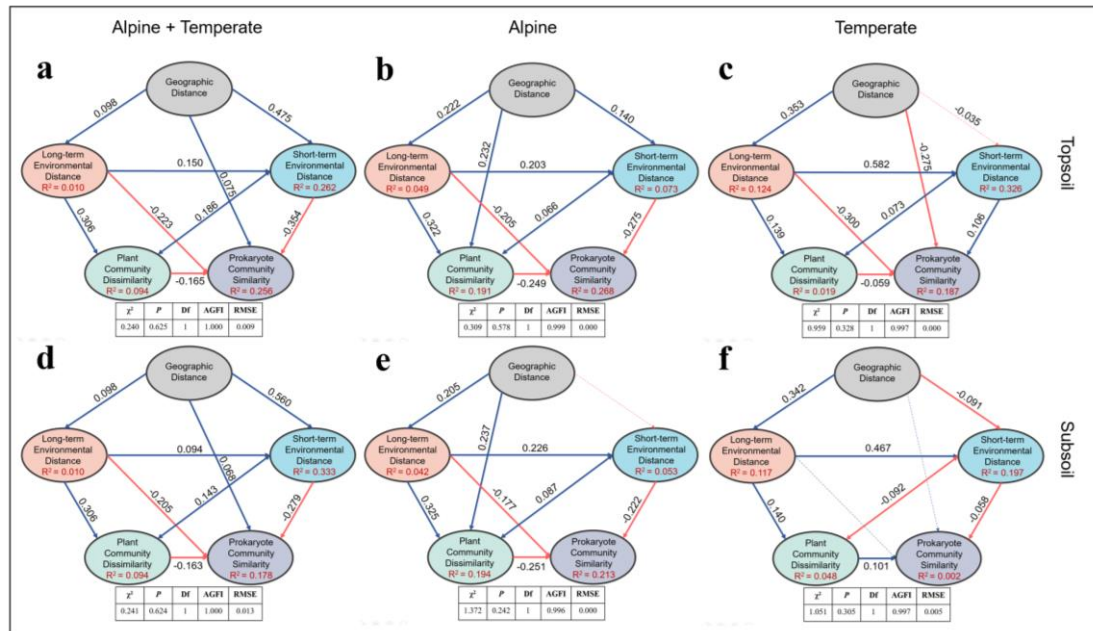

136  
 137 **Figure S6 Structure equation model for geographic distance (based on Euclidean index), long-**  
 138 **term environmental distance, short-term environmental distance, and plant community**  
 139 **dissimilarity based on Bray-Curtis distance in affecting soil prokaryote community similarity.**  
 140 **(a)** topsoil of the northern grassland; **(b)** topsoil of the alpine grassland; **(c)** topsoil of the temperate  
 141 grassland; **(d)** subsoil of the northern grassland; **(e)** subsoil of the alpine grassland; **(f)** subsoil of the  
 142 temperate grassland. Red lines stand for negative correlation and blue lines stand for positive  
 143 correlation; Bold lines stand for significance at 0.05 level.

136  
 137  
 138  
 139  
 140  
 141  
 142  
 143  
 144  
 145  
 146  
 147  
 148  
 149  
 150  
 151  
 152  
 153  
 154  
 155  
 156  
 157  
 158  
 159  
 160  
 161



162

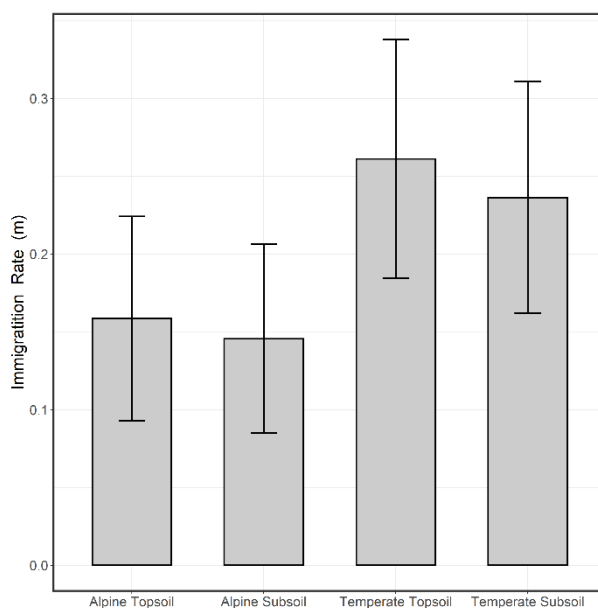

163

164 **Figure S7 The immigration rate (m) of soil prokaryote community in topsoil and subsoil of the**  
165 **alpine and temperate grassland biomes**

166

167

168

169

170

171

172

173

174

175

176

177

178

179

180

181

182

183

184

185

186

187

**Table S1** The mantel correlation of single environment factor with prokaryotic community similarity based on Bray-Curtis distance

|                                | All           |                  | Alpine       |                  | Temperate    |                  | Alpine × Temperate |                  |               |                  |              |                  |               |                  |               |                  |
|--------------------------------|---------------|------------------|--------------|------------------|--------------|------------------|--------------------|------------------|---------------|------------------|--------------|------------------|---------------|------------------|---------------|------------------|
|                                | Topsoil       |                  | Subsoil      |                  | Topsoil      |                  | Subsoil            |                  | Topsoil       |                  | Subsoil      |                  |               |                  |               |                  |
|                                | r             | p                | r            | p                | r            | p                | r                  | p                | r             | p                | r            | p                |               |                  |               |                  |
| MAP                            | <b>0.276</b>  | <b>&lt;0.001</b> | <b>0.259</b> | <b>&lt;0.001</b> | <b>0.274</b> | <b>&lt;0.001</b> | <b>0.280</b>       | <b>&lt;0.001</b> | <b>0.331</b>  | <b>&lt;0.001</b> | -0.006       | 0.797            | <b>0.157</b>  | <b>&lt;0.001</b> | <b>0.128</b>  | <b>&lt;0.001</b> |
| MAT                            | <b>-0.027</b> | <b>0.013</b>     | -0.008       | 0.441            | 0.022        | 0.343            | <b>-0.099</b>      | <b>&lt;0.001</b> | <b>-0.063</b> | <b>0.004</b>     | -0.035       | 0.109            | <b>-0.039</b> | <b>0.013</b>     | <b>-0.006</b> | <b>0.694</b>     |
| pH                             | <b>0.137</b>  | <b>&lt;0.001</b> | <b>0.094</b> | <b>&lt;0.001</b> | <b>0.253</b> | <b>&lt;0.001</b> | 0.204              | <b>&lt;0.001</b> | <b>0.053</b>  | <b>0.016</b>     | 0.023        | 0.289            | -0.042        | 0.006            | -0.027        | 0.084            |
| SOC                            | <b>0.274</b>  | <b>&lt;0.001</b> | <b>0.191</b> | <b>&lt;0.001</b> | <b>0.420</b> | <b>&lt;0.001</b> | <b>0.277</b>       | <b>&lt;0.001</b> | <b>0.124</b>  | <b>&lt;0.001</b> | <b>0.067</b> | <b>0.002</b>     | <b>0.187</b>  | <b>&lt;0.001</b> | <b>0.148</b>  | <b>&lt;0.001</b> |
| TN                             | <b>0.265</b>  | <b>&lt;0.001</b> | <b>0.170</b> | <b>&lt;0.001</b> | <b>0.387</b> | <b>&lt;0.001</b> | <b>0.254</b>       | <b>&lt;0.001</b> | <b>0.115</b>  | <b>&lt;0.001</b> | 0.060        | 0.006            | <b>0.193</b>  | <b>&lt;0.001</b> | <b>0.137</b>  | <b>&lt;0.001</b> |
| TP                             | <b>0.028</b>  | <b>&lt;0.001</b> | <b>0.030</b> | <b>0.006</b>     | -0.000       | 0.985            | 0.027              | 0.240            | <b>0.118</b>  | <b>&lt;0.001</b> | <b>0.094</b> | <b>&lt;0.001</b> | <b>-0.146</b> | <b>&lt;0.001</b> | <b>-0.124</b> | <b>&lt;0.001</b> |
| Long-term environment factors  | <b>0.337</b>  | <b>0.001</b>     | <b>0.291</b> | <b>0.001</b>     | 0.363        | 0.001            | 0.322              | 0.001            | <b>0.328</b>  | <b>0.001</b>     | <b>0.002</b> | <b>0.447</b>     | <b>0.181</b>  | <b>0.002</b>     | <b>0.154</b>  | <b>0.006</b>     |
| SWC                            | <b>0.353</b>  | <b>&lt;0.001</b> | <b>0.332</b> | <b>&lt;0.001</b> | <b>0.602</b> | <b>&lt;0.001</b> | <b>0.553</b>       | <b>&lt;0.001</b> | <b>0.093</b>  | <b>&lt;0.001</b> | 0.003        | 0.909            | <b>0.264</b>  | <b>&lt;0.001</b> | <b>0.241</b>  | <b>&lt;0.001</b> |
| AP                             | <b>0.185</b>  | <b>&lt;0.001</b> | <b>0.074</b> | <b>&lt;0.001</b> | <b>0.355</b> | <b>&lt;0.001</b> | <b>0.145</b>       | <b>&lt;0.001</b> | 0.002         | 0.912            | <b>0.080</b> | <b>&lt;0.001</b> | <b>0.197</b>  | <b>&lt;0.001</b> | <b>0.080</b>  | <b>&lt;0.001</b> |
| DOC                            | <b>0.230</b>  | <b>&lt;0.001</b> | <b>0.145</b> | <b>&lt;0.001</b> | <b>0.350</b> | <b>&lt;0.001</b> | <b>0.279</b>       | <b>&lt;0.001</b> | <b>0.052</b>  | <b>0.017</b>     | 0.002        | 0.913            | <b>0.195</b>  | <b>&lt;0.001</b> | <b>0.088</b>  | <b>&lt;0.001</b> |
| DON                            | <b>0.397</b>  | <b>&lt;0.001</b> | <b>0.330</b> | <b>&lt;0.001</b> | <b>0.334</b> | <b>&lt;0.001</b> | <b>0.260</b>       | <b>&lt;0.001</b> | <b>0.073</b>  | <b>&lt;0.001</b> | 0.035        | 0.116            | <b>0.199</b>  | <b>&lt;0.001</b> | <b>0.159</b>  | <b>&lt;0.001</b> |
| NH <sub>4</sub> <sup>+</sup>   | <b>0.217</b>  | <b>&lt;0.001</b> | <b>0.109</b> | <b>&lt;0.001</b> | <b>0.284</b> | <b>&lt;0.001</b> | <b>0.077</b>       | <b>&lt;0.001</b> | 0.018         | 0.408            | 0.026        | 0.236            | <b>0.109</b>  | <b>&lt;0.001</b> | <b>0.092</b>  | <b>&lt;0.001</b> |
| NO <sub>3</sub> <sup>-</sup>   | <b>0.222</b>  | <b>&lt;0.001</b> | <b>0.111</b> | <b>&lt;0.001</b> | <b>0.121</b> | <b>&lt;0.001</b> | <b>0.078</b>       | <b>&lt;0.001</b> | 0.048         | 0.027            | <b>0.053</b> | <b>0.016</b>     | 0.008         | 0.611            | -0.002        | 0.920            |
| Short-term environment factors | <b>0.391</b>  | <b>0.001</b>     | <b>0.294</b> | <b>0.001</b>     | <b>0.367</b> | <b>0.001</b>     | <b>0.305</b>       | <b>0.001</b>     | 0.104         | 0.091            | <b>0.039</b> | <b>0.251</b>     | 0.258         | 0.001            | 0.216         | 0.001            |

191 **Table S2** Partial Mantel test for correlations between prokaryotic community similarity based on Euclidean distance and each variable within long-term or short-term  
 192 environmental factors in topsoil or subsoil.

|                                | All     |                  | Alpine  |                  |         |                  | Temperate |                  |         |                  | Alpine × Temperate |       |         |                  |         |                  |
|--------------------------------|---------|------------------|---------|------------------|---------|------------------|-----------|------------------|---------|------------------|--------------------|-------|---------|------------------|---------|------------------|
|                                | Topsoil |                  | Subsoil |                  | Topsoil |                  | Subsoil   |                  | Topsoil |                  | Subsoil            |       | Topsoil |                  | Subsoil |                  |
|                                | r       | p                | r       | p                | r       | p                | r         | p                | r       | p                | r                  | p     | r       | p                | r       | p                |
| MAP                            | 0.251   | <b>&lt;0.001</b> | 0.241   | <b>&lt;0.001</b> | 0.249   | <b>0.002</b>     | 0.253     | <b>0.003</b>     | 0.334   | <b>&lt;0.001</b> | -0.010             | 0.546 | 0.176   | <b>&lt;0.001</b> | 0.149   | <b>&lt;0.001</b> |
| MAT                            | -0.039  | 0.984            | -0.016  | 0.740            | -0.003  | 0.518            | -0.131    | 0.991            | -0.064  | 0.983            | -0.043             | 0.876 | -0.065  | 0.980            | 0.003   | 0.439            |
| pH                             | 0.072   | 0.092            | 0.067   | 0.115            | 0.129   | 0.070            | 0.194     | <b>0.025</b>     | 0.052   | 0.215            | 0.011              | 0.377 | 0.064   | 0.139            | 0.028   | 0.302            |
| SOC                            | 0.193   | <b>&lt;0.001</b> | 0.144   | <b>0.004</b>     | 0.269   | <b>&lt;0.001</b> | 0.152     | <b>0.009</b>     | 0.128   | <b>0.022</b>     | 0.049              | 0.210 | 0.089   | <b>0.021</b>     | 0.064   | 0.057            |
| TN                             | 0.197   | <b>&lt;0.001</b> | 0.131   | <b>0.007</b>     | 0.239   | <b>&lt;0.001</b> | 0.150     | <b>0.003</b>     | 0.117   | <b>0.021</b>     | 0.042              | 0.237 | 0.116   | <b>0.007</b>     | 0.101   | <b>0.016</b>     |
| TP                             | 0.017   | 0.358            | 0.030   | 0.278            | -0.022  | 0.576            | 0.035     | 0.265            | 0.119   | 0.056            | 0.080              | 0.123 | -0.232  | 1.000            | -0.181  | 0.996            |
| Long-term environment factors  | 0.290   | <b>0.001</b>     | 0.262   | <b>0.001</b>     | 0.306   | <b>&lt;0.001</b> | 0.272     | <b>0.003</b>     | 0.329   | <b>0.001</b>     | -0.017             | 0.562 | 0.203   | <b>0.001</b>     | 0.159   | <b>0.003</b>     |
| SWC                            | 0.265   | <b>&lt;0.001</b> | 0.266   | <b>&lt;0.001</b> | 0.534   | <b>&lt;0.001</b> | 0.488     | <b>&lt;0.001</b> | 0.008   | 0.407            | 0.002              | 0.435 | 0.167   | <b>0.002</b>     | 0.225   | <b>&lt;0.001</b> |
| AP                             | 0.143   | <b>0.004</b>     | 0.065   | 0.093            | 0.297   | <b>&lt;0.001</b> | 0.114     | 0.056            | -0.010  | 0.515            | 0.080              | 0.129 | 0.163   | <b>&lt;0.001</b> | 0.038   | 0.231            |
| DOC                            | 0.187   | <b>&lt;0.001</b> | 0.114   | <b>0.007</b>     | 0.285   | <b>&lt;0.001</b> | 0.207     | <b>0.010</b>     | 0.059   | <b>0.034</b>     | 0.002              | 0.407 | 0.221   | <b>&lt;0.001</b> | 0.117   | <b>0.027</b>     |
| DON                            | 0.365   | <b>&lt;0.001</b> | 0.286   | <b>&lt;0.001</b> | 0.278   | <b>&lt;0.001</b> | 0.211     | <b>0.002</b>     | -0.089  | 0.919            | 0.037              | 0.247 | 0.225   | <b>&lt;0.001</b> | 0.200   | <b>0.002</b>     |
| NH <sub>4</sub> <sup>+</sup>   | 0.143   | <b>0.006</b>     | 0.083   | 0.078            | 0.223   | <b>&lt;0.001</b> | 0.053     | 0.241            | -0.071  | 0.908            | 0.026              | 0.315 | 0.026   | 0.331            | 0.065   | 0.093            |
| NO <sub>3</sub> <sup>-</sup>   | 0.202   | <b>&lt;0.001</b> | 0.094   | <b>0.032</b>     | 0.133   | <b>0.031</b>     | 0.091     | 0.073            | 0.018   | 0.368            | 0.053              | 0.224 | 0.068   | 0.140            | 0.024   | 0.323            |
| Short-term environment factors | 0.353   | <b>0.001</b>     | 0.266   | <b>0.001</b>     | 0.311   | <b>&lt;0.001</b> | 0.250     | <b>0.002</b>     | -0.107  | 0.968            | 0.042              | 0.276 | 0.273   | <b>0.001</b>     | 0.219   | <b>0.001</b>     |

193

194 **Table S3** Partial correlation of single environment factor with prokaryotic community similarity based on Euclidean distance at the scale of 0-1,920 km and 1,920 -  
 195 4,000 km in top-soil, and at the scale of 0-1,760 km and 1,760 - 4,000 km in sub-soil.

|                                | Topsoil   |        |               |        | Subsoil   |        |               |        |
|--------------------------------|-----------|--------|---------------|--------|-----------|--------|---------------|--------|
|                                | 0 - 1,920 |        | 1,920 - 4,000 |        | 0 - 1,760 |        | 1,760 - 4,000 |        |
|                                | r         | p      | r             | p      | r         | p      | r             | p      |
| MAP                            | 0.194     | <0.001 | 0.177         | <0.001 | 0.207     | <0.001 | 0.130         | <0.001 |
| MAT                            | -0.125    | <0.001 | 0.059         | 0.001  | -0.152    | <0.001 | 0.027         | 0.119  |
| pH                             | 0.101     | <0.001 | 0.065         | <0.001 | 0.100     | <0.001 | 0.068         | <0.001 |
| SOC                            | 0.199     | <0.001 | 0.288         | <0.001 | 0.091     | <0.001 | 0.204         | <0.001 |
| TN                             | 0.159     | <0.001 | 0.244         | <0.001 | 0.023     | 0.114  | 0.156         | <0.001 |
| TP                             | 0.065     | <0.001 | 0.047         | 0.011  | 0.096     | <0.001 | 0.071         | <0.001 |
| Long-term Environment Factors  | 0.272     | <0.001 | 0.274         | <0.001 | 0.268     | <0.001 | 0.223         | <0.001 |
| SWC                            | 0.187     | <0.001 | 0.306         | <0.001 | 0.095     | <0.001 | 0.193         | <0.001 |
| AP                             | 0.154     | <0.001 | 0.214         | <0.001 | 0.132     | <0.001 | 0.118         | <0.001 |
| DOC                            | 0.320     | <0.001 | 0.318         | <0.001 | 0.167     | <0.001 | 0.221         | <0.001 |
| DON                            | 0.311     | <0.001 | 0.257         | <0.001 | 0.241     | <0.001 | 0.219         | <0.001 |
| NH <sub>4</sub> <sup>+</sup>   | 0.269     | <0.001 | 0.219         | <0.001 | 0.065     | <0.001 | 0.065         | <0.001 |
| NO <sub>3</sub> <sup>-</sup>   | 0.104     | <0.001 | 0.013         | 0.479  | 0.036     | 0.013  | 0.079         | <0.001 |
| Short-term Environment Factors | 0.377     | <0.001 | 0.267         | <0.001 | 0.275     | <0.001 | 0.180         | <0.001 |

196
